# Supplementary material for: Comparative Transcriptional Profiling of Bacillus cereus Sensu Lato Strains during Growth in CO2-Bicarbonate and Aerobic Atmospheres
Source: PLOS journal article supplement (doi:10.1371/journal.pone.0004904), 2009-03-18
Supplement: S5 (10.1371/journal.pone.0004904.s005) [file journal.pone.0004904.s005]

| Table S5. Genes with increased expression in <i>B. cereus</i> G9241 in CO <sub>2</sub> (MGM + 0.8% bicarbonate) |                                                                              |                 |
|-----------------------------------------------------------------------------------------------------------------|------------------------------------------------------------------------------|-----------------|
| SEQUENCE ID                                                                                                     | GENE INFO                                                                    | Fold difference |
| BCE_G9241_0136                                                                                                  | <i>gerD</i> ; spore_germination_protein_GerD                                 | 3.83            |
| BCE_G9241_0146                                                                                                  | <i>glmS</i> ; glucosamine--fructose-6-phosphate_aminotransferase_isomerizing | 2.40            |
| BCE_G9241_0189                                                                                                  | hypothetical_protein_protein                                                 | 10.41           |
| BCE_G9241_0195                                                                                                  | hypothetical_protein_protein                                                 | 5.58            |
| BCE_G9241_0198                                                                                                  | conserved_hypothetical_protein_protein_subfamily                             | 2.05            |
| BCE_G9241_0231                                                                                                  | <i>hpcE-1</i> ; 2-hydroxyhepta-24-diene-17-dioate_isomerase                  | 2.07            |
| BCE_G9241_0232                                                                                                  | <i>hmgA</i> ; homogentisate_12-dioxygenase                                   | 2.59            |
| BCE_G9241_0347                                                                                                  | ferrichrome_binding_protein                                                  | 2.47            |
| BCE_G9241_0348                                                                                                  | ferrichrome_transport_permease_fhuB                                          | 4.64            |
| BCE_G9241_0368                                                                                                  | fatty_acid_desaturase                                                        | 3.91            |
| BCE_G9241_0370                                                                                                  | amino_acid_ABC_transporter_periplasmic_amino_acid-binding_protein            | 2.14            |
| BCE_G9241_0372                                                                                                  | <i>glnQ</i> ; glutamine_ABC_transporter_ATP-binding_protein                  | 2.14            |
| BCE_G9241_0407                                                                                                  | surface_protein                                                              | 2.05            |
| BCE_G9241_0415                                                                                                  | cation-transporting_ATPase_E1-E2_family                                      | 8.04            |
| BCE_G9241_0466                                                                                                  | dihydroorotase                                                               | 3.39            |
| BCE_G9241_0467                                                                                                  | conserved_hypothetical_protein_protein_TIGR01777                             | 3.06            |
| BCE_G9241_0499                                                                                                  | <i>mrcA</i> ; penicillin-binding_protein_1A                                  | 4.03            |
| BCE_G9241_0594                                                                                                  | ubiquinone/menaquinone_biosynthesis_methyltransferase_UBIE                   | 3.23            |
| BCE_G9241_0635                                                                                                  | hypothetical_protein_cytosolic_protein                                       | 6.67            |
| BCE_G9241_0703                                                                                                  | acriflavin_resistance_plasma_membrane_protein                                | 2.68            |
| BCE_G9241_0755                                                                                                  | nitroreductase_family_protein_putative                                       | 4.20            |
| BCE_G9241_0776                                                                                                  | outer_surface_protein                                                        | 5.99            |
| BCE_G9241_0777                                                                                                  | transcription_regulator_probable_putative                                    | 2.08            |
| BCE_G9241_0778                                                                                                  | PTS_system_IIA_component                                                     | 6.19            |
| BCE_G9241_0779                                                                                                  | PTS_system_IIB_component                                                     | 5.97            |
| BCE_G9241_0780                                                                                                  | <i>celB</i> ; PTS_system_IIC_component                                       | 5.80            |
| BCE_G9241_0781                                                                                                  | conserved_hypothetical_protein_protein                                       | 7.70            |
| BCE_G9241_0782                                                                                                  | outer_surface_protein                                                        | 12.24           |
| BCE_G9241_0785                                                                                                  | <i>ybjZ</i> ; ABC_transporter_ATP-binding_protein                            | 5.11            |
| BCE_G9241_0786                                                                                                  | ABC_transporter_ATP-binding_protein                                          | 5.32            |
| BCE_G9241_0787                                                                                                  | periplasmic_component_of_efflux_system                                       | 4.33            |
| BCE_G9241_0788                                                                                                  | hypothetical_protein_protein                                                 | 3.26            |
| BCE_G9241_0791                                                                                                  | peptide_ABC_transporter_permease_protein_putative                            | 2.03            |
| BCE_G9241_0863                                                                                                  | putative_transcriptional_regulator                                           | 2.04            |
| BCE_G9241_0874                                                                                                  | N-acetylmuramoyl-L-alanine_amidase                                           | 3.08            |
| BCE_G9241_0882                                                                                                  | sulfate_transporter                                                          | 2.06            |
| BCE_G9241_0883                                                                                                  | hypothetical_protein_protein                                                 | 2.06            |
| BCE_G9241_0905                                                                                                  | proline_racemase_putative                                                    | 2.45            |
| BCE_G9241_0906                                                                                                  | <i>arcB</i> ; ornithine_cyclodeaminase                                       | 6.08            |
| BCE_G9241_0907                                                                                                  | hypothetical_protein_protein                                                 | 9.57            |
| BCE_G9241_1030                                                                                                  | conserved_hypothetical_protein_protein                                       | 3.70            |
| BCE_G9241_1031                                                                                                  | conserved_hypothetical_protein_protein                                       | 39.89           |

| Table S5. Genes with increased expression in <i>B. cereus</i> G9241 in CO <sub>2</sub> (MGM + 0.8% bicarbonate) |                                                                                           |                 |
|-----------------------------------------------------------------------------------------------------------------|-------------------------------------------------------------------------------------------|-----------------|
| SEQUENCE ID                                                                                                     | GENE INFO                                                                                 | Fold difference |
| BCE_G9241_1032                                                                                                  | conserved_hypothetical_protein_protein                                                    | 15.37           |
| BCE_G9241_1037                                                                                                  | glyoxalase_family_protein                                                                 | 2.35            |
| BCE_G9241_1038                                                                                                  | glyoxylase_family_protein                                                                 | 2.25            |
| BCE_G9241_1052                                                                                                  | <i>rep</i> ; ATP-dependent_DNA_helicase_rep                                               | 2.44            |
| BCE_G9241_1053                                                                                                  | ATP-dependent_DNA_helicase_rep                                                            | 3.02            |
| BCE_G9241_1092                                                                                                  | <i>lfadD-7</i> ; ong-chain-fatty-acid--CoA_ligase                                         | 2.48            |
| BCE_G9241_1097                                                                                                  | dienelactone_hydrolase_domain_protein                                                     | 2.05            |
| BCE_G9241_1102                                                                                                  | transcriptional_regulator_AraC_family_putative                                            | 4.13            |
| BCE_G9241_1115                                                                                                  | S-layer_homology_domain                                                                   | 2.52            |
| BCE_G9241_1129                                                                                                  | hypothetical_protein_cytosolic_protein                                                    | 2.02            |
| BCE_G9241_1174                                                                                                  | hypothetical_protein_protein                                                              | 2.13            |
| BCE_G9241_1175                                                                                                  | beta-ketoacyl_synthase_N-terminal_domain_protein                                          | 3.33            |
| BCE_G9241_1189                                                                                                  | hypothetical_protein_protein                                                              | 2.54            |
| BCE_G9241_1205                                                                                                  | Hep_Hag_family                                                                            | 2.27            |
| BCE_G9241_1228                                                                                                  | ATP-dependent_DNA_helicase                                                                | 2.03            |
| BCE_G9241_1259                                                                                                  | NADH_oxidase                                                                              | 2.01            |
| BCE_G9241_1260                                                                                                  | hypothetical_protein_cytosolic_protein                                                    | 2.28            |
| BCE_G9241_1261                                                                                                  | conserved_hypothetical_protein_protein                                                    | 3.49            |
| BCE_G9241_1324                                                                                                  | <i>maoC</i> ; enoyl-CoA_hydratase_R-specific                                              | 14.54           |
| BCE_G9241_1325                                                                                                  | PhaP_protein                                                                              | 11.38           |
| BCE_G9241_1326                                                                                                  | hypothetical_protein_protein                                                              | 9.77            |
| BCE_G9241_1327                                                                                                  | transcriptional_regulator_PadR_family_putative                                            | 8.68            |
| BCE_G9241_1328                                                                                                  | PhaR_protein                                                                              | 4.73            |
| BCE_G9241_1329                                                                                                  | <i>fabG</i> ; 3-oxoacyl-(acyl-carrier-protein)_reductase                                  | 4.55            |
| BCE_G9241_1330                                                                                                  | polyhydroxyalkanoic_acid_synthase_VCA0688                                                 | 5.98            |
| BCE_G9241_1350                                                                                                  | oligoendopeptidase_F_putative                                                             | 2.24            |
| BCE_G9241_1351                                                                                                  | conserved_hypothetical_protein_protein                                                    | 15.25           |
| BCE_G9241_1353                                                                                                  | sporulation_kinase                                                                        | 2.44            |
| BCE_G9241_1380                                                                                                  | muramoyltetrapeptide_carboxypeptidase_putative                                            | 4.34            |
| BCE_G9241_1390                                                                                                  | flavodoxin                                                                                | 5.86            |
| BCE_G9241_1391                                                                                                  | conserved_hypothetical_protein_protein                                                    | 6.87            |
| BCE_G9241_1422                                                                                                  | imidazoleglycerol-phosphate_dehydratase                                                   | 2.58            |
| BCE_G9241_1423                                                                                                  | <i>hisH</i> ;<br>imidazole_glycerol_phosphate_synthase_glutamine_amidotransferase_subunit | 2.73            |
| BCE_G9241_1424                                                                                                  | phosphoribosylformimino-5-aminoimidazole_carboxamide_ribose_isomerase                     | 2.54            |
| BCE_G9241_1425                                                                                                  | conserved_hypothetical_protein_protein                                                    | 2.74            |
| BCE_G9241_1426                                                                                                  | <i>hisF</i> ; imidazoleglycerol_phosphate_synthase_cyclase_subunit                        | 2.72            |
| BCE_G9241_1427                                                                                                  | phosphoribosyl-AMP_cyclohydrolase                                                         | 2.12            |
| BCE_G9241_1428                                                                                                  | phosphoribosyl-ATP_pyrophosphohydrolase                                                   | 2.05            |
| BCE_G9241_1431                                                                                                  | MW2224                                                                                    | 2.64            |
| BCE_G9241_1451                                                                                                  | conserved_hypothetical_protein_protein                                                    | 6.40            |
| BCE_G9241_1452                                                                                                  | phage_shock_protein_A_putative                                                            | 9.83            |
| BCE_G9241_1453                                                                                                  | transporter_yvqF                                                                          | 2.19            |

| Table S5. Genes with increased expression in <i>B. cereus</i> G9241 in CO <sub>2</sub> (MGM + 0.8% bicarbonate) |                                                                            |                 |
|-----------------------------------------------------------------------------------------------------------------|----------------------------------------------------------------------------|-----------------|
| SEQUENCE ID                                                                                                     | GENE INFO                                                                  | Fold difference |
| BCE_G9241_1454                                                                                                  | sensor_histidine_kinase_VC1276                                             | 2.56            |
| BCE_G9241_1455                                                                                                  | <i>vraR</i> ; DNA-binding response regulator LuxR family                   | 2.52            |
| BCE_G9241_1468                                                                                                  | hypothetical protein membrane Spanning protein                             | 2.29            |
| BCE_G9241_1481                                                                                                  | <i>deoD</i> ; purine nucleoside phosphorylase                              | 2.23            |
| BCE_G9241_1483                                                                                                  | <i>npr</i> ; predicted transposase                                         | 2.03            |
| BCE_G9241_1484                                                                                                  | hypothetical protein protein                                               | 2.84            |
| BCE_G9241_1485                                                                                                  | conserved hypothetical protein protein                                     | 2.10            |
| BCE_G9241_1497                                                                                                  | cytochrome c-type biogenesis protein putative                              | 2.32            |
| BCE_G9241_1501                                                                                                  | cell wall endopeptidase family M23/M37                                     | 3.15            |
| BCE_G9241_1525                                                                                                  | <i>gpsA</i> ; NAD-dependent glycerol-3-phosphate dehydrogenase superfamily | 2.67            |
| BCE_G9241_1542                                                                                                  | cytochrome b6-f complex iron-sulfur subunit putative                       | 3.01            |
| BCE_G9241_1543                                                                                                  | menaquinol-cytochrome c reductase cytochrome b subunit                     | 3.42            |
| BCE_G9241_1544                                                                                                  | cytochrome b-c complex cytochrome b subunit putative                       | 4.62            |
| BCE_G9241_1561                                                                                                  | <i>panC</i> ; pantoate--beta-alanine ligase                                | 2.18            |
| BCE_G9241_1579                                                                                                  | spore coat protein                                                         | 2.29            |
| BCE_G9241_1593                                                                                                  | hypothetical protein protein                                               | 8.14            |
| BCE_G9241_1605                                                                                                  | conserved hypothetical protein protein                                     | 3.47            |
| BCE_G9241_1617                                                                                                  | hypothetical protein protein                                               | 2.12            |
| BCE_G9241_1618                                                                                                  | hypothetical protein protein                                               | 2.51            |
| BCE_G9241_1619                                                                                                  | hypothetical protein protein                                               | 2.75            |
| BCE_G9241_1647                                                                                                  | Na <sup>+</sup> /H <sup>+</sup> antiporter                                 | 5.26            |
| BCE_G9241_1650                                                                                                  | conserved hypothetical protein integral membrane protein putative          | 2.04            |
| BCE_G9241_1654                                                                                                  | hypothetical protein membrane Spanning protein                             | 4.72            |
| BCE_G9241_1721                                                                                                  | VanZ like family family                                                    | 2.03            |
| BCE_G9241_1722                                                                                                  | conserved hypothetical protein protein                                     | 3.99            |
| BCE_G9241_1723                                                                                                  | conserved hypothetical protein protein                                     | 2.92            |
| BCE_G9241_1724                                                                                                  | dienelactone hydrolase family                                              | 3.91            |
| BCE_G9241_1725                                                                                                  | JEMB                                                                       | 3.83            |
| BCE_G9241_1726                                                                                                  | transposase putative                                                       | 3.69            |
| BCE_G9241_1727                                                                                                  | reticulocyte binding protein                                               | 5.23            |
| BCE_G9241_1728                                                                                                  | collagen adhesion protein                                                  | 3.20            |
| BCE_G9241_1751                                                                                                  | conserved hypothetical protein protein                                     | 2.45            |
| BCE_G9241_1772                                                                                                  | <i>fumC</i> ; fumarate hydratase class II                                  | 4.28            |
| BCE_G9241_1774                                                                                                  | <i>fumC</i> ; fumarate hydratase class II                                  | 4.48            |
| BCE_G9241_1818                                                                                                  | conserved hypothetical protein protein                                     | 2.18            |
| BCE_G9241_1828                                                                                                  | <i>fabH</i> ; 3-oxoacyl-(acyl-carrier-protein) synthase III subfamily      | 6.89            |
| BCE_G9241_1830                                                                                                  | <i>hflX</i> ; GTP-binding protein hflX                                     | 3.14            |
| BCE_G9241_1899                                                                                                  | BNR/Asp-box repeat domain protein                                          | 7.49            |
| BCE_G9241_1951                                                                                                  | <i>appC</i> ; cytochrome d ubiquinol oxidase subunit I                     | 13.42           |
| BCE_G9241_1952                                                                                                  | <i>cydB</i> ; cytochrome d ubiquinol oxidase subunit II                    | 17.33           |
| BCE_G9241_1953                                                                                                  | ABC transporter ATP-binding protein CydD                                   | 29.09           |
| BCE_G9241_1954                                                                                                  | ABC transporter ATP-binding protein CydC                                   | 45.53           |
| BCE_G9241_1963                                                                                                  | nitroreductase family protein                                              | 3.23            |

| Table S5. Genes with increased expression in <i>B. cereus</i> G9241 in CO <sub>2</sub> (MGM + 0.8% bicarbonate) |                                                                                                                    |                 |
|-----------------------------------------------------------------------------------------------------------------|--------------------------------------------------------------------------------------------------------------------|-----------------|
| SEQUENCE ID                                                                                                     | GENE INFO                                                                                                          | Fold difference |
| BCE_G9241_1989                                                                                                  | transcriptional_regulator_putative                                                                                 | 3.24            |
| BCE_G9241_1997                                                                                                  | MW0093_putative                                                                                                    | 3.70            |
| BCE_G9241_1998                                                                                                  | siderophore_biosynthesis_protein_IucC_family                                                                       | 4.25            |
| BCE_G9241_2001                                                                                                  | conserved_hypothetical_protein_protein                                                                             | 4.34            |
| BCE_G9241_2002                                                                                                  | hypothetical_protein_cytosolic_protein                                                                             | 5.62            |
| BCE_G9241_2016                                                                                                  | ABC_transporter_permease_protein_putative                                                                          | 5.64            |
| BCE_G9241_2023                                                                                                  | conserved_hypothetical_protein_protein                                                                             | 2.76            |
| BCE_G9241_2024                                                                                                  | conserved_hypothetical_protein_protein                                                                             | 3.58            |
| BCE_G9241_2031                                                                                                  | <i>dps</i> ; non-specific_DNA-binding_protein_Dps / _iron-binding_ferritin-like_antioxidant_protein / _ferroxidase | 5.02            |
| BCE_G9241_2032                                                                                                  | conserved_hypothetical_protein_protein                                                                             | 2.79            |
| BCE_G9241_2036                                                                                                  | flavin_monoamine_oxidase-related_protein                                                                           | 2.34            |
| BCE_G9241_2060                                                                                                  | acyl-CoA_hydrolase                                                                                                 | 2.04            |
| BCE_G9241_2069                                                                                                  | CBS_domain_protein                                                                                                 | 3.31            |
| BCE_G9241_2079                                                                                                  | conserved_hypothetical_protein_protein                                                                             | 4.93            |
| BCE_G9241_2080                                                                                                  | stomatin-like_protein                                                                                              | 5.79            |
| BCE_G9241_2081                                                                                                  | hypothetical_protein_protein                                                                                       | 5.65            |
| BCE_G9241_2131                                                                                                  | hypothetical_protein_conserved_protein_putative                                                                    | 2.60            |
| BCE_G9241_2150                                                                                                  | siroheme_synthase_putative                                                                                         | 2.03            |
| BCE_G9241_2151                                                                                                  | transcriptional_regulator_NirR_putative                                                                            | 2.84            |
| BCE_G9241_2176                                                                                                  | bacillolysin                                                                                                       | 2.41            |
| BCE_G9241_2200                                                                                                  | hypothetical_protein_protein                                                                                       | 3.96            |
| BCE_G9241_2201                                                                                                  | penicillin-binding_protein                                                                                         | 28.62           |
| BCE_G9241_2214                                                                                                  | cytochrome_c_oxidase_Cu(A)_center_assembly_protein                                                                 | 2.42            |
| BCE_G9241_2229                                                                                                  | <i>adhP</i> ; alcohol_dehydrogenase_propanol-preferring                                                            | 4.33            |
| BCE_G9241_2230                                                                                                  | oligopeptide_transport_system_permease_protein_oppC                                                                | 3.63            |
| BCE_G9241_2262                                                                                                  | <i>ctfA</i> ; butyrate-acetoacetate_CoA-transferase_subunit_A                                                      | 2.31            |
| BCE_G9241_2263                                                                                                  | coenzyme_A_transferase_beta_subunit                                                                                | 2.68            |
| BCE_G9241_2264                                                                                                  | peptidase_M20/M25/M40_family_putative                                                                              | 2.96            |
| BCE_G9241_2265                                                                                                  | beta-lysine_acetyltransferase                                                                                      | 2.24            |
| BCE_G9241_2268                                                                                                  | <i>kamA</i> ; L-lysine_23-aminomutase                                                                              | 26.24           |
| BCE_G9241_2269                                                                                                  | YokU                                                                                                               | 11.83           |
| BCE_G9241_2277                                                                                                  | sporulation-control_protein                                                                                        | 3.90            |
| BCE_G9241_2283                                                                                                  | conserved_hypothetical_protein_protein                                                                             | 3.18            |
| BCE_G9241_2309                                                                                                  | penicillin-binding_protein_1A                                                                                      | 2.35            |
| BCE_G9241_2314                                                                                                  | <i>mmgE</i> ; 2-methylcitrate_dehydratase                                                                          | 3.06            |
| BCE_G9241_2315                                                                                                  | <i>prpB</i> ; methylisocitrate_lyase                                                                               | 2.65            |
| BCE_G9241_2317                                                                                                  | <i>acdA</i> ; acyl-CoA_dehydrogenase_short-chain_specific                                                          | 2.59            |
| BCE_G9241_2318                                                                                                  | 3-hydroxyisobutyrate_dehydrogenase                                                                                 | 2.45            |
| BCE_G9241_2319                                                                                                  | <i>mmsA</i> ; methylmalonate-semialdehyde_dehydrogenase                                                            | 3.31            |
| BCE_G9241_2322                                                                                                  | enol-CoA_hydratase/isomerase_family_protein                                                                        | 3.30            |
| BCE_G9241_2334                                                                                                  | <i>dhbC</i> ; isochorismate_synthase                                                                               | 3.48            |
| BCE_G9241_2335                                                                                                  | yersiniabactin_synthetase_salicylate_ligase_component                                                              | 11.63           |
| BCE_G9241_2336                                                                                                  | <i>dhbB</i> ; isochorismatase                                                                                      | 5.31            |

| Table S5. Genes with increased expression in <i>B. cereus</i> G9241 in CO <sub>2</sub> (MGM + 0.8% bicarbonate) |                                                               |                 |
|-----------------------------------------------------------------------------------------------------------------|---------------------------------------------------------------|-----------------|
| SEQUENCE ID                                                                                                     | GENE INFO                                                     | Fold difference |
| BCE_G9241_2337                                                                                                  | reticulocyte_binding_protein                                  | 6.86            |
| BCE_G9241_2339                                                                                                  | drug_transporter_putative                                     | 8.91            |
| BCE_G9241_2340                                                                                                  | EntD/Gsp/HetI/Sfp_family_protein_putative                     | 3.26            |
| BCE_G9241_2344                                                                                                  | DinB_protein                                                  | 2.16            |
| BCE_G9241_2345                                                                                                  | alkaline_protease_A                                           | 3.96            |
| BCE_G9241_2353                                                                                                  | ABC_transporter_ATP-binding_protein                           | 2.86            |
| BCE_G9241_2354                                                                                                  | ABC_transporter_permease_protein_probable_SP0913_putative     | 3.58            |
| BCE_G9241_2387                                                                                                  | cold_shock_protein-related_protein                            | 2.05            |
| BCE_G9241_2420                                                                                                  | <i>omt</i> ; caffeoyl-CoA_O-methyltransferase                 | 6.84            |
| BCE_G9241_2421                                                                                                  | tellurite_resistance_protein                                  | 3.59            |
| BCE_G9241_2422                                                                                                  | conserved_hypothetical_protein_protein                        | 3.13            |
| BCE_G9241_2460                                                                                                  | SpoIIISA_like_protein                                         | 3.02            |
| BCE_G9241_2461                                                                                                  | SpoIIISA_like_protein                                         | 2.56            |
| BCE_G9241_2464                                                                                                  | <i>pepD-2</i> ; aminoacyl-histidine_dipeptidase               | 2.51            |
| BCE_G9241_2465                                                                                                  | hypothetical_protein_protein                                  | 2.58            |
| BCE_G9241_2468                                                                                                  | Patatin-like_phospholipase_family                             | 2.00            |
| BCE_G9241_2503                                                                                                  | <i>crt</i> ; 3-hydroxybutyryl-CoA_dehydratase                 | 2.64            |
| BCE_G9241_2504                                                                                                  | <i>pccB</i> ; propionyl-CoA_carboxylase_beta_chain            | 4.87            |
| BCE_G9241_2505                                                                                                  | <i>acs-4</i> ; acetyl-CoA_synthetase                          | 3.82            |
| BCE_G9241_2535                                                                                                  | oligoendopeptidase_putative                                   | 3.13            |
| BCE_G9241_2550                                                                                                  | formamidase                                                   | 2.87            |
| BCE_G9241_2555                                                                                                  | ABC_transporter_ATP-binding_protein_putative                  | 4.92            |
| BCE_G9241_2556                                                                                                  | acetyltransferase                                             | 7.27            |
| BCE_G9241_2575                                                                                                  | conserved_hypothetical_protein_protein                        | 2.72            |
| BCE_G9241_2579                                                                                                  | <i>cypA</i> ; cytochrome_P450                                 | 4.73            |
| BCE_G9241_2580                                                                                                  | transporter_putative                                          | 5.65            |
| BCE_G9241_2581                                                                                                  | streptogramin_A_acetyl_transferase                            | 6.27            |
| BCE_G9241_2590                                                                                                  | macrolide_glycosyltransferase                                 | 2.07            |
| BCE_G9241_2612                                                                                                  | DegV_family_protein_putative                                  | 2.08            |
| BCE_G9241_2654                                                                                                  | outer_membrane_protein_romA                                   | 2.36            |
| BCE_G9241_2656                                                                                                  | YwqG-like_protein                                             | 2.95            |
| BCE_G9241_2657                                                                                                  | putative_esterase_family                                      | 7.09            |
| BCE_G9241_2658                                                                                                  | conserved_hypothetical_protein_protein                        | 5.82            |
| BCE_G9241_2675                                                                                                  | conserved_hypothetical_protein_protein                        | 2.18            |
| BCE_G9241_2726                                                                                                  | uridine_kinase_putative                                       | 2.21            |
| BCE_G9241_2738                                                                                                  | <i>rpiA</i> ; ribose_5-phosphate_isomerase                    | 4.20            |
| BCE_G9241_2740                                                                                                  | hypothetical_protein_protein                                  | 17.84           |
| BCE_G9241_2741                                                                                                  | chitin-binding_protein_putative                               | 18.66           |
| BCE_G9241_2762                                                                                                  | Butirosin_biosynthesis_protein_BtrG                           | 2.19            |
| BCE_G9241_2788                                                                                                  | conserved_hypothetical_protein_protein                        | 3.67            |
| BCE_G9241_2789                                                                                                  | conserved_hypothetical_protein_protein                        | 2.82            |
| BCE_G9241_2800                                                                                                  | cell_wall-associated_hydrolase                                | 3.71            |
| BCE_G9241_2801                                                                                                  | mandelate_racemase/muconate_lactonizing_enzyme_family_protein | 4.47            |
| BCE_G9241_2812                                                                                                  | X-pro_dipeptidyl-peptidase_putative                           | 2.16            |

| Table S5. Genes with increased expression in <i>B. cereus</i> G9241 in CO <sub>2</sub> (MGM + 0.8% bicarbonate) |                                                                            |                 |
|-----------------------------------------------------------------------------------------------------------------|----------------------------------------------------------------------------|-----------------|
| SEQUENCE ID                                                                                                     | GENE INFO                                                                  | Fold difference |
| BCE_G9241_2857                                                                                                  | hypothetical_protein_protein                                               | 6.04            |
| BCE_G9241_2871                                                                                                  | hypothetical_protein_protein                                               | 16.98           |
| BCE_G9241_2897                                                                                                  | PTS_system_IIC_component_putative                                          | 2.14            |
| BCE_G9241_2902                                                                                                  | hypothetical_protein_protein                                               | 2.81            |
| BCE_G9241_2903                                                                                                  | transcriptional_regulator_putative                                         | 2.81            |
| BCE_G9241_2904                                                                                                  | hypothetical_protein_protein                                               | 2.78            |
| BCE_G9241_2905                                                                                                  | hypothetical_protein_protein                                               | 3.13            |
| BCE_G9241_2936                                                                                                  | fructose-bisphosphate_aldolase                                             | 2.42            |
| BCE_G9241_2939                                                                                                  | glyoxalase_family_protein_superfamily                                      | 2.00            |
| BCE_G9241_2941                                                                                                  | antibiotic_biosynthesis_monooxygenase_domain_protein                       | 3.64            |
| BCE_G9241_2971                                                                                                  | <i>moxR</i> ; ATPase_MoxR_family                                           | 3.60            |
| BCE_G9241_2972                                                                                                  | hypothetical_protein_secreted_protein                                      | 3.31            |
| BCE_G9241_2973                                                                                                  | hypothetical_protein_membrane_Spanning_protein                             | 3.16            |
| BCE_G9241_2986                                                                                                  | <i>phnA</i> ; alkylphosphonate_utilization_operon_protein_PhnA             | 6.06            |
| BCE_G9241_2987                                                                                                  | sulfate_permease_family_protein_VCA0077                                    | 8.76            |
| BCE_G9241_2988                                                                                                  | transcriptional_regulator_arsR_family                                      | 4.33            |
| BCE_G9241_3046                                                                                                  | short-chain-specific_acyl-CoA_dehydrogenase                                | 3.44            |
| BCE_G9241_3047                                                                                                  | EpiH/GdmH-related_protein                                                  | 3.11            |
| BCE_G9241_3048                                                                                                  | acetyltransferase_GNAT_family                                              | 2.22            |
| BCE_G9241_3060                                                                                                  | metal-dependent_hydrolase                                                  | 2.02            |
| BCE_G9241_3100                                                                                                  | hydrolase_isochorismatase_family                                           | 2.14            |
| BCE_G9241_3150                                                                                                  | transposase_(IS4_family)_domain_protein                                    | 2.25            |
| BCE_G9241_3151                                                                                                  | conserved_hypothetical_protein_protein                                     | 2.41            |
| BCE_G9241_3170                                                                                                  | NADPH-cytochrome_P450_reductase                                            | 2.07            |
| BCE_G9241_3187                                                                                                  | putative_phosphohydrolases_Icc_family                                      | 2.53            |
| BCE_G9241_3188                                                                                                  | penicillin-binding_protein                                                 | 2.23            |
| BCE_G9241_3201                                                                                                  | permease_putative                                                          | 4.69            |
| BCE_G9241_3208                                                                                                  | MccC_family_protein                                                        | 2.19            |
| BCE_G9241_3211                                                                                                  | conserved_hypothetical_protein_protein                                     | 2.44            |
| BCE_G9241_3212                                                                                                  | <i>serA</i> ; D-isomer_specific_2-hydroxyacid_dehydrogenase_family_protein | 2.68            |
| BCE_G9241_3213                                                                                                  | <i>serC</i> ; phosphoserine_aminotransferase                               | 2.14            |
| BCE_G9241_3220                                                                                                  | penicillin_G_acylase_putative                                              | 2.49            |
| BCE_G9241_3227                                                                                                  | internalin                                                                 | 2.36            |
| BCE_G9241_3236                                                                                                  | 6-aminohexanoate-dimer_hydrolase                                           | 3.10            |
| BCE_G9241_3249                                                                                                  | SWIM_zinc_finger_family                                                    | 2.26            |
| BCE_G9241_3252                                                                                                  | conserved_hypothetical_protein_protein                                     | 4.71            |
| BCE_G9241_3278                                                                                                  | conserved_hypothetical_protein_protein                                     | 2.25            |
| BCE_G9241_3280                                                                                                  | conserved_hypothetical_protein_protein                                     | 2.83            |
| BCE_G9241_3309                                                                                                  | collagen-like_triple_helix_repeat_protein                                  | 2.06            |
| BCE_G9241_3317                                                                                                  | conserved_hypothetical_protein_protein                                     | 2.05            |
| BCE_G9241_3318                                                                                                  | ATP_synthase_protein_I                                                     | 2.55            |
| BCE_G9241_3323                                                                                                  | dTDP-glucose_46-dehydratase_putative                                       | 2.05            |
| BCE_G9241_3325                                                                                                  | CDP-4-dehydro-6-deoxy-D-gulose_4-reductase                                 | 2.01            |

| Table S5. Genes with increased expression in <i>B. cereus</i> G9241 in CO <sub>2</sub> (MGM + 0.8% bicarbonate) |                                                                                  |                 |
|-----------------------------------------------------------------------------------------------------------------|----------------------------------------------------------------------------------|-----------------|
| SEQUENCE ID                                                                                                     | GENE INFO                                                                        | Fold difference |
| BCE_G9241_3395                                                                                                  | AiiA-like_enzyme                                                                 | 2.06            |
| BCE_G9241_3399                                                                                                  | alcohol dehydrogenase zinc-containing                                            | 2.92            |
| BCE_G9241_3412                                                                                                  | ferrichrome ABC transporter permease protein                                     | 2.35            |
| BCE_G9241_3425                                                                                                  | acetyltransferase GNAT family                                                    | 2.01            |
| BCE_G9241_3460                                                                                                  | hy                                                                               | 3.33            |
| BCE_G9241_3477                                                                                                  | hypothetical protein protein                                                     | 2.43            |
| BCE_G9241_3491                                                                                                  | reticulocyte binding protein                                                     | 2.67            |
| BCE_G9241_3496                                                                                                  | D-alanyl-D-alanine carboxypeptidase                                              | 2.50            |
| BCE_G9241_3500                                                                                                  | <i>dhaS</i> ; aldehyde dehydrogenase family protein                              | 4.28            |
| BCE_G9241_3504                                                                                                  | integral membrane protein                                                        | 2.21            |
| BCE_G9241_3543                                                                                                  | ABC transporter permease protein putative                                        | 2.43            |
| BCE_G9241_3544                                                                                                  | ABC transporter ATP-binding protein                                              | 2.62            |
| BCE_G9241_3554                                                                                                  | <i>nrdG</i> ; anaerobic_ribonucleoside-triphosphate reductase activating protein | 10.01           |
| BCE_G9241_3555                                                                                                  | anaerobic_ribonucleoside-triphosphate reductase putative                         | 8.06            |
| BCE_G9241_3572                                                                                                  | conserved hypothetical protein protein                                           | 2.47            |
| BCE_G9241_3573                                                                                                  | spore_coat_protein_L-related_protein                                             | 2.63            |
| BCE_G9241_3580                                                                                                  | <i>fadA-2</i> ; 3-ketoacyl-CoA thiolase                                          | 2.02            |
| BCE_G9241_3589                                                                                                  | CsbD-like family                                                                 | 12.74           |
| BCE_G9241_3597                                                                                                  | phospholipase/carboxylesterase family protein                                    | 2.77            |
| BCE_G9241_3598                                                                                                  | glyoxalase family protein putative                                               | 3.21            |
| BCE_G9241_3599                                                                                                  | <i>opuE</i> ; sodium/proline symporter                                           | 2.08            |
| BCE_G9241_3603                                                                                                  | <i>carD</i> ; CarD-like transcriptional regulator                                | 4.78            |
| BCE_G9241_3604                                                                                                  | <i>hutG</i> ; formiminoglutamase                                                 | 4.47            |
| BCE_G9241_3605                                                                                                  | <i>hutI</i> ; imidazolonepropionase                                              | 7.65            |
| BCE_G9241_3606                                                                                                  | <i>hutU</i> ; urocanate hydratase                                                | 6.26            |
| BCE_G9241_3623                                                                                                  | CcdC protein                                                                     | 3.12            |
| BCE_G9241_3624                                                                                                  | cytochrome c-type biogenesis protein putative                                    | 4.39            |
| BCE_G9241_3664                                                                                                  | N-acetylmuramoyl-L-alanine amidase                                               | 3.13            |
| BCE_G9241_3672                                                                                                  | <i>pXOI-18</i> ; DNA integration/recombination/inversion protein                 | 3.85            |
| BCE_G9241_3673                                                                                                  | hypothetical protein membrane Spanning protein                                   | 2.06            |
| BCE_G9241_3695                                                                                                  | copper-translocating P-type ATPase                                               | 4.61            |
| BCE_G9241_3696                                                                                                  | <i>pacS</i> ; cation-transporting ATPase P-type                                  | 6.80            |
| BCE_G9241_3700                                                                                                  | IroE protein                                                                     | 2.78            |
| BCE_G9241_3736                                                                                                  | phosphoglycerol transferase                                                      | 8.40            |
| BCE_G9241_3797                                                                                                  | YlxP-like protein                                                                | 2.01            |
| BCE_G9241_3814                                                                                                  | <i>codY</i> ; transcriptional regulator CodY                                     | 3.59            |
| BCE_G9241_3815                                                                                                  | <i>hslU</i> ; heat shock protein HslVU ATPase subunit HslU                       | 3.05            |
| BCE_G9241_3816                                                                                                  | <i>clpQ</i> ; heat shock protein HslV                                            | 2.50            |
| BCE_G9241_3820                                                                                                  | MW1132                                                                           | 4.23            |
| BCE_G9241_3834                                                                                                  | <i>fabG</i> ; 3-oxoacyl-(acyl-carrier-protein) reductase                         | 2.40            |
| BCE_G9241_3866                                                                                                  | hypothetical protein membrane Spanning protein                                   | 2.60            |
| BCE_G9241_3931                                                                                                  | cytochrome c oxidase subunit III                                                 | 3.72            |
| BCE_G9241_3932                                                                                                  | <i>qoxA</i> ; quinol oxidase subunit I                                           | 3.77            |

| Table S5. Genes with increased expression in <i>B. cereus</i> G9241 in CO <sub>2</sub> (MGM + 0.8% bicarbonate) |                                                                                              |                 |
|-----------------------------------------------------------------------------------------------------------------|----------------------------------------------------------------------------------------------|-----------------|
| SEQUENCE ID                                                                                                     | GENE INFO                                                                                    | Fold difference |
| BCE_G9241_3933                                                                                                  | cytochrome_c_oxidase_polypeptide_II                                                          | 3.06            |
| BCE_G9241_3935                                                                                                  | <i>ctaA</i> ; cytochrome oxidase assembly protein                                            | 2.02            |
| BCE_G9241_3996                                                                                                  | <i>metE</i> ; 5-methyltetrahydropteroyltrimethylglutamate--_homocysteine_S-methyltransferase | 3.11            |
| BCE_G9241_4002                                                                                                  | conserved_hypothetical_protein_protein                                                       | 9.65            |
| BCE_G9241_4042                                                                                                  | conserved_hypothetical_protein_protein                                                       | 3.36            |
| BCE_G9241_4043                                                                                                  | conserved_hypothetical_protein_protein                                                       | 6.54            |
| BCE_G9241_4108                                                                                                  | alpha/beta hydrolase                                                                         | 2.12            |
| BCE_G9241_4117                                                                                                  | <i>ribD</i> ; riboflavin_biosynthesis_protein_RibD                                           | 3.31            |
| BCE_G9241_4118                                                                                                  | <i>ribE</i> ; riboflavin_synthase_alpha_subunit                                              | 4.17            |
| BCE_G9241_4119                                                                                                  | <i>ribBA</i> ; 34-dihydroxy-2-butanone_4-phosphate_synthase/GTP_cyclohydrolase_II            | 4.95            |
| BCE_G9241_4120                                                                                                  | <i>ribH</i> ; 6, 7-dimethyl-8-ribityllumazine_synthase                                       | 6.71            |
| BCE_G9241_4128                                                                                                  | conserved_hypothetical_protein_protein                                                       | 2.13            |
| BCE_G9241_4133                                                                                                  | transcriptional_regulator_MarR_family_putative                                               | 2.56            |
| BCE_G9241_4173                                                                                                  | MutT/nudix_family_protein                                                                    | 2.04            |
| BCE_G9241_4195                                                                                                  | cell wall surface anchor family protein putative                                             | 2.48            |
| BCE_G9241_4196                                                                                                  | transposase_IS4_family_putative                                                              | 4.52            |
| BCE_G9241_4249                                                                                                  | hypothetical_protein_protein                                                                 | 3.06            |
| BCE_G9241_4250                                                                                                  | conserved_hypothetical_protein_protein                                                       | 9.61            |
| BCE_G9241_4260                                                                                                  | conserved_hypothetical_protein_protein                                                       | 2.79            |
| BCE_G9241_4273                                                                                                  | transposase (IS4 family) domain protein                                                      | 2.07            |
| BCE_G9241_4308                                                                                                  | superoxide_dismutase                                                                         | 2.20            |
| BCE_G9241_4387                                                                                                  | hypothetical_protein_membrane_Spanning_protein                                               | 2.03            |
| BCE_G9241_4388                                                                                                  | conserved_hypothetical_protein_protein                                                       | 2.75            |
| BCE_G9241_4389                                                                                                  | spore_germination_protein_xc_precursor_bacillus                                              | 3.70            |
| BCE_G9241_4393                                                                                                  | transposase                                                                                  | 2.38            |
| BCE_G9241_4400                                                                                                  | transposase_X                                                                                | 7.66            |
| BCE_G9241_4406                                                                                                  | <i>npr</i> ; predicted_transposase                                                           | 3.34            |
| BCE_G9241_4508                                                                                                  | <i>mreC</i> ; rod_shape-determining_protein_MreC                                             | 2.45            |
| BCE_G9241_4531                                                                                                  | hypothetical_protein_protein                                                                 | 6.45            |
| BCE_G9241_4532                                                                                                  | conserved_hypothetical_protein_protein                                                       | 7.75            |
| BCE_G9241_4671                                                                                                  | maoC_family_protein                                                                          | 2.31            |
| BCE_G9241_4695                                                                                                  | <i>pepQ</i> ; proline_dipeptidase                                                            | 2.08            |
| BCE_G9241_4707                                                                                                  | <i>ald</i> ; alanine_dehydrogenase                                                           | 2.03            |
| BCE_G9241_4709                                                                                                  | universal_stress_protein_family                                                              | 5.84            |
| BCE_G9241_4714                                                                                                  | conserved_hypothetical_protein_protein                                                       | 2.41            |
| BCE_G9241_4715                                                                                                  | cysteine-rich_protein                                                                        | 3.14            |
| BCE_G9241_4729                                                                                                  | <i>acs-6</i> ; acetyl-CoA_synthetase                                                         | 4.67            |
| BCE_G9241_4753                                                                                                  | <i>acuC</i> ; acetoin_utilization_protein_AcuC                                               | 5.25            |
| BCE_G9241_4754                                                                                                  | hydrolase_alpha/beta_fold_family_putative                                                    | 3.42            |
| BCE_G9241_4782                                                                                                  | nicotinate_phosphoribosyltransferase                                                         | 2.22            |
| BCE_G9241_4800                                                                                                  | transcriptional_regulator_DeoR_family-related_protein                                        | 5.08            |
| BCE_G9241_4810                                                                                                  | <i>carD</i> ; CarD-like_transcriptional_regulator                                            | 2.70            |



| Table S5. Genes with increased expression in <i>B. cereus</i> G9241 in CO <sub>2</sub> (MGM + 0.8% bicarbonate) |                                                                  |                 |
|-----------------------------------------------------------------------------------------------------------------|------------------------------------------------------------------|-----------------|
| SEQUENCE ID                                                                                                     | GENE INFO                                                        | Fold difference |
| BCE_G9241_4836                                                                                                  | Na <sup>+</sup> /H <sup>+</sup> _antiporter_putative             | 5.99            |
| BCE_G9241_4837                                                                                                  | TrkA_C-terminal_domain_protein                                   | 3.23            |
| BCE_G9241_4838                                                                                                  | DNA_integration/recombination/inversion_protein                  | 2.31            |
| BCE_G9241_4913                                                                                                  | conserved_hypothetical_protein_protein                           | 6.49            |
| BCE_G9241_4921                                                                                                  | cell_surface_protein                                             | 2.73            |
| BCE_G9241_4922                                                                                                  | hypothetical_protein_protein                                     | 2.08            |
| BCE_G9241_4923                                                                                                  | conserved_hypothetical_protein_protein                           | 4.13            |
| BCE_G9241_4956                                                                                                  | hypothetical_protein_protein                                     | 4.38            |
| BCE_G9241_4957                                                                                                  | hypothetical_protein_protein                                     | 3.31            |
| BCE_G9241_5024                                                                                                  | transcriptional_regulator_DeoR_family                            | 2.35            |
| BCE_G9241_5067                                                                                                  | DNA-binding_protein                                              | 2.07            |
| BCE_G9241_5069                                                                                                  | cell_wall_endopeptidase_family_M23/M37                           | 2.41            |
| BCE_G9241_5102                                                                                                  | <i>acd-7</i> ; acyl-CoA_dehydrogenase                            | 7.44            |
| BCE_G9241_5103                                                                                                  | hypothetical_protein_protein                                     | 9.48            |
| BCE_G9241_5104                                                                                                  | <i>atoB-4</i> ; acetyl-CoA_acetyltransferase                     | 9.05            |
| BCE_G9241_5105                                                                                                  | <i>hbd-1</i> ; putative_3-hydroxyacyl-CoA_dehydrogenase_FadB     | 12.11           |
| BCE_G9241_5106                                                                                                  | hypothetical_protein_protein                                     | 7.34            |
| BCE_G9241_5108                                                                                                  | hypothetical_protein_protein                                     | 4.17            |
| BCE_G9241_5109                                                                                                  | D-alanyl-D-alanine_carboxypeptidase_putative                     | 2.48            |
| BCE_G9241_5133                                                                                                  | DedA_family_protein_putative                                     | 3.06            |
| BCE_G9241_5166                                                                                                  | IG_hypothetical_protein_16995                                    | 3.02            |
| BCE_G9241_5196                                                                                                  | hypothetical_protein_protein                                     | 3.32            |
| BCE_G9241_5199                                                                                                  | iron_compound_ABC_transporter_ATP-binding_protein                | 4.24            |
| BCE_G9241_5200                                                                                                  | iron_compound_ABC_transporter_permease_protein                   | 3.81            |
| BCE_G9241_5201                                                                                                  | iron_compound_ABC_transporter_permease_protein                   | 4.52            |
| BCE_G9241_5202                                                                                                  | iron(III)_ABC_transporter_periplasmic_binding_protein_putative   | 4.03            |
| BCE_G9241_5231                                                                                                  | <i>crh</i> ; phosphocarrier_protein_Hpr                          | 2.14            |
| BCE_G9241_5236                                                                                                  | integral_membrane_protein                                        | 2.11            |
| BCE_G9241_5273                                                                                                  | ribosomal_subunit_interface_protein                              | 2.47            |
| BCE_G9241_5355                                                                                                  | integral_membrane_protein                                        | 4.25            |
| BCE_G9241_5423                                                                                                  | phosphoglycerate_transporter_protein                             | 7.31            |
| BCE_G9241_5459                                                                                                  | <i>alkK-2</i> ; medium-chain_acyl-CoA_ligase                     | 4.33            |
| BCE_G9241_5469                                                                                                  | NADH-ubiquinone_oxidoreductase_NQO10_subunit_(NQO10)_putative    | 2.10            |
| BCE_G9241_5470                                                                                                  | <i>nuoI</i> ; NADH-ubiquinone_oxidoreductase_NQO9_subunit_(NQO9) | 2.78            |
| BCE_G9241_5515                                                                                                  | transcriptional_regulator_tetR_family                            | 2.12            |
| BCE_G9241_5516                                                                                                  | <i>acdA</i> ; acyl-CoA_dehydrogenase_short-chain_specific        | 2.44            |
| BCE_G9241_5531                                                                                                  | collagen_adhesin_protein                                         | 2.88            |
| BCE_G9241_5563                                                                                                  | <i>fhuB</i> ; ferrichrome_transport_permease_fhuB                | 2.80            |
| BCE_G9241_5623                                                                                                  | acriflavin_resistance_plasma_membrane_protein                    | 3.04            |
| BCE_G9241_CNI_0001                                                                                              | transposase_(IS4_family)_domain_protein                          | 2.03            |
| BCE_G9241_CNI_0048                                                                                              | <i>pXOI-80</i> ; peptidase_M23/M37_family                        | 2.05            |
| BCE_G9241_CNI_0049                                                                                              | reticulocyte_binding_protein                                     | 2.85            |
| BCE_G9241_CNI_0053                                                                                              | conserved_hypothetical_protein_protein                           | 2.42            |

| <b>Table S5. Genes with increased expression in <i>B. cereus</i> G9241 in CO<sub>2</sub> (MGM + 0.8% bicarbonate)</b> |                                                                                   |                        |
|-----------------------------------------------------------------------------------------------------------------------|-----------------------------------------------------------------------------------|------------------------|
| <b>SEQUENCE ID</b>                                                                                                    | <b>GENE INFO</b>                                                                  | <b>Fold difference</b> |
| BCE_G9241_CNI_0054                                                                                                    | transposase_(IS4_family)_domain_protein                                           | 2.29                   |
| BCE_G9241_CNI_0055                                                                                                    | acetyltransferase GNAT_family_family                                              | 2.06                   |
| BCE_G9241_CNI_0123                                                                                                    | transcriptional_regulator GntR_family                                             | 2.08                   |
| BCE_G9241_CNI_0125                                                                                                    | conserved_hypothetical_protein_protein                                            | 8.91                   |
| BCE_G9241_CNI_0139                                                                                                    | main_capsid_protein_Gp34-like_protein                                             | 2.32                   |
| BCE_G9241_CNI_0141                                                                                                    | protein_gp8                                                                       | 2.63                   |
| BCE_G9241_CNI_0142                                                                                                    | gp9_putative                                                                      | 2.41                   |
| BCE_G9241_CNI_0143                                                                                                    | conserved_hypothetical_protein_protein                                            | 2.76                   |
| BCE_G9241_CNI_0144                                                                                                    | major_capsid_protein_gpP                                                          | 3.20                   |
| BCE_G9241_CNI_0145                                                                                                    | gp14_-like_protein                                                                | 3.25                   |
| BCE_G9241_CNI_0152                                                                                                    | major_capsid_protein_gpP                                                          | 3.21                   |
| BCE_G9241_CNI_0154                                                                                                    | protein_gp15                                                                      | 3.19                   |
| BCE_G9241_CNI_0155                                                                                                    | <i>carB</i> ; carbamoyl-phosphate_synthase_large_subunit_domain_protein           | 3.15                   |
| BCE_G9241_CNI_0166                                                                                                    | conserved_hypothetical_protein_protein                                            | 3.21                   |
| BCE_G9241_CNI_0215                                                                                                    | peptidase_M23/M37_family_putative                                                 | 2.19                   |
| BCE_G9241_CNI_0216                                                                                                    | glutaredoxin-like_protein NrdH-related_protein                                    | 2.68                   |
| BCE_G9241_CNI_0217                                                                                                    | conserved_hypothetical_protein_protein                                            | 2.75                   |
| BCE_G9241_CNI_0218                                                                                                    | conserved_hypothetical_protein_protein                                            | 2.96                   |
| BCE_G9241_CNI_0219                                                                                                    | hypothetical_protein_protein                                                      | 3.07                   |
| BCE_G9241_CNI_0220                                                                                                    | hypothetical_protein_protein                                                      | 3.11                   |
| BCE_G9241_CNI_0222                                                                                                    | conserved_hypothetical_protein_protein                                            | 2.84                   |
| BCE_G9241_CNI_0223                                                                                                    | hypothetical_protein_protein                                                      | 3.04                   |
| BCE_G9241_CNI_0224                                                                                                    | conserved_hypothetical_protein_protein                                            | 2.85                   |
| BCE_G9241_CNI_0225                                                                                                    | hypothetical_protein_protein                                                      | 2.50                   |
| BCE_G9241_CNI_0248                                                                                                    | transposase_for_insertion_sequence_element_is231e                                 | 2.06                   |
| BCE_G9241_CNI_0261                                                                                                    | adhesin_protein                                                                   | 3.69                   |
| BCE_G9241_CNI_0265                                                                                                    | acetyltransferase                                                                 | 2.55                   |
| BCE_G9241_CNI_0284                                                                                                    | membrane_protein                                                                  | 2.01                   |
| BCE_G9241_CNI_0314                                                                                                    | transposase_(IS4_family)_domain_protein                                           | 2.10                   |
| BCE_G9241_pBC218_0008                                                                                                 | conserved_hypothetical_protein_protein                                            | 8.62                   |
| BCE_G9241_pBC218_0010                                                                                                 | hypothetical_protein_protein                                                      | 47.05                  |
| BCE_G9241_pBC218_0011                                                                                                 | hypothetical_protein_protein                                                      | 50.77                  |
| BCE_G9241_pBC218_0012                                                                                                 | <i>pXO2-42</i> ; S-layer_protein/_peptidoglycan_endo-beta-N-acetylglucosaminidase | 28.56                  |
| BCE_G9241_pBC218_0013                                                                                                 | periplasmic_component_of_efflux_system                                            | 11.27                  |
| BCE_G9241_pBC218_0015                                                                                                 | phosphoglycerate_transporter_protein                                              | 2.92                   |
| BCE_G9241_pBC218_0017                                                                                                 | ABC_transporter_ATP-binding_protein                                               | 2.73                   |
| BCE_G9241_pBC218_0018                                                                                                 | <i>ybjZ</i> ; ABC_transporter_ATP-binding_protein                                 | 2.64                   |
| BCE_G9241_pBC218_0020                                                                                                 | DNA-binding_response_regulator_VicR                                               | 2.09                   |
| BCE_G9241_pBC218_0021                                                                                                 | sensory_box_histidine_kinase_VicK_putative                                        | 2.00                   |
| BCE_G9241_pBC218_0024                                                                                                 | protease_HhoA                                                                     | 7.46                   |
| BCE_G9241_pBC218_0025                                                                                                 | hypothetical_protein_protein                                                      | 53.30                  |
| BCE_G9241_pBC218_0026                                                                                                 | protective_antigen                                                                | 40.13                  |
| BCE_G9241_pBC218_0027                                                                                                 | lethal_factor_precursor                                                           | 30.70                  |

| <b>Table S5. Genes with increased expression in <i>B. cereus</i> G9241 in CO<sub>2</sub> (MGM + 0.8% bicarbonate)</b> |                                                                |                        |
|-----------------------------------------------------------------------------------------------------------------------|----------------------------------------------------------------|------------------------|
| <b>SEQUENCE ID</b>                                                                                                    | <b>GENE INFO</b>                                               | <b>Fold difference</b> |
| BCE_G9241_pBC218_0030                                                                                                 | transposase                                                    | 2.09                   |
| BCE_G9241_pBC218_0031                                                                                                 | transposase IS3 family interruption                            | 3.06                   |
| BCE_G9241_pBC218_0033                                                                                                 | transposase IS3 family interruption                            | 3.29                   |
| BCE_G9241_pBC218_0034                                                                                                 | pVS1 resolvase                                                 | 6.11                   |
| BCE_G9241_pBC218_0035                                                                                                 | collagen triple helix repeat protein putative                  | 2.02                   |
| BCE_G9241_pBC218_0037                                                                                                 | IS861 transposase OrfB putative                                | 2.06                   |
| BCE_G9241_pBC218_0038                                                                                                 | transposase                                                    | 2.54                   |
| BCE_G9241_pBC218_0039                                                                                                 | enterotoxin_B                                                  | 42.88                  |
| BCE_G9241_pBC218_0040                                                                                                 | non-hemolytic enterotoxin lytic component L1                   | 75.72                  |
| BCE_G9241_pBC218_0042                                                                                                 | non-hemolytic enterotoxin lytic component L2 putative          | 24.70                  |
| BCE_G9241_pBC218_0043                                                                                                 | S-layer homology domain protein                                | 41.00                  |
| BCE_G9241_pBC218_0044                                                                                                 | serine protease DO                                             | 2.29                   |
| BCE_G9241_pBC218_0045                                                                                                 | <i>pXO1-109</i> ; transcriptional regulator <i>arsR</i> family | 54.40                  |
| BCE_G9241_pBC218_0046                                                                                                 | membrane protein putative                                      | 77.91                  |
| BCE_G9241_pBC218_0047                                                                                                 | probable electron transfer protein Rv1937 putative             | 89.28                  |
| BCE_G9241_pBC218_0048                                                                                                 | <i>cysK</i> ; cysteine synthase A                              | 50.40                  |
| BCE_G9241_pBC218_0049                                                                                                 | <i>pXO2-61</i> ; trans-acting positive regulator (Atx_A)       | 2.52                   |
| BCE_G9241_pBC218_0051                                                                                                 | transposase                                                    | 2.10                   |
| BCE_G9241_pBC218_0055                                                                                                 | <i>yngK-1</i> ; YngK protein                                   | 6.87                   |
| BCE_G9241_pBC218_0057                                                                                                 | pXO1_ORF14-like protein                                        | 25.96                  |
| BCE_G9241_pBC218_0058                                                                                                 | collagen adhesion protein                                      | 2.56                   |
| BCE_G9241_pBC218_0059                                                                                                 | polysaccharide translocase protein putative                    | 39.13                  |
| BCE_G9241_pBC218_0060                                                                                                 | CMP-sialic acid synthetase putative                            | 40.68                  |
| BCE_G9241_pBC218_0061                                                                                                 | UDP-N-acetylglucosamine 2-epimerase putative                   | 44.33                  |
| BCE_G9241_pBC218_0062                                                                                                 | sialic acid synthase putative                                  | 18.34                  |
| BCE_G9241_pBC218_0063                                                                                                 | glycosyl transferase putative                                  | 77.14                  |
| BCE_G9241_pBC218_0064                                                                                                 | <i>galU</i> ; UTP-glucose-1-phosphate uridylyltransferase      | 42.26                  |
| BCE_G9241_pBC218_0065                                                                                                 | exopolysaccharide biosynthesis protein                         | 57.93                  |
| BCE_G9241_pBC218_0066                                                                                                 | <i>wzz</i> ; chain length determinant protein                  | 39.44                  |
| BCE_G9241_pBC218_0067                                                                                                 | transcriptional regulator LytR family                          | 21.08                  |
| BCE_G9241_pBC218_0068                                                                                                 | hypothetical protein protein                                   | 8.71                   |
| BCE_G9241_pBC218_0069                                                                                                 | polysaccharide capsule synthesis protein                       | 22.30                  |
| BCE_G9241_pBC218_0070                                                                                                 | hypothetical protein protein                                   | 13.21                  |
| BCE_G9241_pBC218_0071                                                                                                 | glycosyl transferase WecB/TagA/CpsF family                     | 11.79                  |
| BCE_G9241_pBC218_0072                                                                                                 | <i>wzy</i> ; polysaccharide polymerase                         | 9.07                   |
| BCE_G9241_pBC218_0073                                                                                                 | glycosyl transferase group 2 family protein                    | 15.82                  |
| BCE_G9241_pBC218_0075                                                                                                 | first of two overlapping orfs with similarity to IS3 genes     | 10.51                  |
| BCE_G9241_pBC218_0076                                                                                                 | transposase                                                    | 10.37                  |
| BCE_G9241_pBC218_0079                                                                                                 | transposase (IS4 family)                                       | 7.00                   |
| BCE_G9241_pBC218_0080                                                                                                 | MAEBL putative                                                 | 2.23                   |
| BCE_G9241_pBC218_0081                                                                                                 | <i>dnaX</i> ; DNA polymerase III gamma and tau subunits        | 7.30                   |
| BCE_G9241_pBC218_0082                                                                                                 | <i>tnpB</i> ; transposase_all7245                              | 11.06                  |
| BCE_G9241_pBC218_0084                                                                                                 | DNA polymerase III gamma and tau subunits putative             | 2.25                   |
| BCE_G9241_pBC218_0085                                                                                                 | restriction endonuclease family                                | 2.88                   |

| <b>Table S5. Genes with increased expression in <i>B. cereus</i> G9241 in CO<sub>2</sub> (MGM + 0.8% bicarbonate)</b> |                                                                 |                        |
|-----------------------------------------------------------------------------------------------------------------------|-----------------------------------------------------------------|------------------------|
| <b>SEQUENCE ID</b>                                                                                                    | <b>GENE INFO</b>                                                | <b>Fold difference</b> |
| BCE_G9241_pBC218_0086                                                                                                 | SEC-C_motif_domain_protein                                      | 2.05                   |
| BCE_G9241_pBC218_0088                                                                                                 | hypothetical_protein_protein                                    | 4.36                   |
| BCE_G9241_pBC218_0089                                                                                                 | conserved_hypothetical_protein_protein                          | 2.02                   |
| BCE_G9241_pBC218_0096                                                                                                 | conserved_hypothetical_protein_protein_subfamily                | 3.71                   |
| BCE_G9241_pBC218_0097                                                                                                 | hypothetical_protein_cytosolic_protein                          | 3.30                   |
| BCE_G9241_pBC218_0098                                                                                                 | hypothetical_protein_protein                                    | 2.88                   |
| BCE_G9241_pBC218_0099                                                                                                 | hypothetical_protein_protein                                    | 2.45                   |
| BCE_G9241_pBC218_0104                                                                                                 | geranylgeranyl_hydrogenase_BchP_putative                        | 7.68                   |
| BCE_G9241_pBC218_0106                                                                                                 | metallo-beta-lactamase_superfamily_protein                      | 2.84                   |
| BCE_G9241_pBC218_0107                                                                                                 | hypothetical_protein_protein                                    | 6.12                   |
| BCE_G9241_pBC218_0108                                                                                                 | hypothetical_protein_protein                                    | 2.68                   |
| BCE_G9241_pBC218_0119                                                                                                 | lipoprotein_NLP/P60_family                                      | 28.54                  |
| BCE_G9241_pBC218_0120                                                                                                 | membrane_protein_putative                                       | 22.39                  |
| BCE_G9241_pBC218_0121                                                                                                 | hypothetical_protein_protein                                    | 6.17                   |
| BCE_G9241_pBC218_0122                                                                                                 | conserved_hypothetical_protein_protein                          | 3.10                   |
| BCE_G9241_pBC218_0126                                                                                                 | pXO1_ORF16-like_protein                                         | 2.76                   |
| BCE_G9241_pBC218_0128                                                                                                 | <i>gnd</i> ; 6-phosphogluconate_dehydrogenase_decarboxylating   | 2.64                   |
| BCE_G9241_pBC218_0132                                                                                                 | pXO1_ORF14-like_protein                                         | 2.03                   |
| BCE_G9241_pBC218_0133                                                                                                 | hypothetical_protein_protein                                    | 3.20                   |
| BCE_G9241_pBC218_0134                                                                                                 | hypothetical_protein_protein                                    | 3.44                   |
| BCE_G9241_pBC218_0135                                                                                                 | <i>pXOI-42</i> ; conjugation_protein_TraG/TraD_family           | 11.36                  |
| BCE_G9241_pBC218_0136                                                                                                 | hypothetical_protein_protein                                    | 7.68                   |
| BCE_G9241_pBC218_0141                                                                                                 | DNA_primase                                                     | 2.77                   |
| BCE_G9241_pBC218_0142                                                                                                 | <i>tnpB</i> ; transposase_all7245                               | 2.16                   |
| BCE_G9241_pBC218_0147                                                                                                 | surface_adhesion_protein_putative                               | 3.12                   |
| BCE_G9241_pBC218_0150                                                                                                 | <i>pXOI-23</i> ; group II intron reverse transcriptase_maturase | 3.43                   |
| BCE_G9241_pBC218_0154                                                                                                 | conserved_hypothetical_protein_protein                          | 2.76                   |
| BCE_G9241_pBC218_0155                                                                                                 | conserved_hypothetical_protein_protein                          | 2.68                   |
| BCE_G9241_pBC218_0174                                                                                                 | conserved_hypothetical_protein_protein                          | 16.54                  |
| BCE_G9241_pBC218_0175                                                                                                 | hypothetical_protein_protein                                    | 2.32                   |
| BCE_G9241_pBClin29_0001                                                                                               | phage_putative_tail_component_N-terminal_domain_protein         | 3.52                   |
| BCE_G9241_pBClin29_0002                                                                                               | prophage_LambdaBa01_minor_structural_protein                    | 2.90                   |
| BCE_G9241_pBClin29_0003                                                                                               | hypothetical_protein_protein                                    | 2.63                   |
| BCE_G9241_pBClin29_0004                                                                                               | XpaF1_protein                                                   | 2.73                   |
| BCE_G9241_pBClin29_0028                                                                                               | transposase-like_protein_B                                      | 2.84                   |
| BCE_G9241_pBClin29_0029                                                                                               | phage_protein-related_protein                                   | 3.15                   |
| BCE_G9241_pBClin29_0036                                                                                               | IstB-like_ATP_binding_protein_family                            | 2.29                   |
| BCE_G9241_pBClin29_0037                                                                                               | hypothetical_protein_protein                                    | 2.53                   |
| BCE_G9241_pBClin29_0038                                                                                               | phage_protein                                                   | 2.70                   |
| BCE_G9241_pBCXO1_0008                                                                                                 | conserved_hypothetical_protein_protein                          | 2.71                   |
| BCE_G9241_pBCXO1_0023                                                                                                 | conserved_hypothetical_protein_protein                          | 2.16                   |
| BCE_G9241_pBCXO1_0030                                                                                                 | conserved_hypothetical_protein_protein                          | 2.54                   |
| BCE_G9241_pBCXO1_0045                                                                                                 | transposase_(IS4_family)                                        | 2.05                   |
| BCE_G9241_pBCXO1_0061                                                                                                 | conserved_hypothetical_protein_protein                          | 2.77                   |

| <b>Table S5. Genes with increased expression in <i>B. cereus</i> G9241 in CO<sub>2</sub> (MGM + 0.8% bicarbonate)</b> |                                                                        |                        |
|-----------------------------------------------------------------------------------------------------------------------|------------------------------------------------------------------------|------------------------|
| <b>SEQUENCE ID</b>                                                                                                    | <b>GENE INFO</b>                                                       | <b>Fold difference</b> |
| BCE_G9241_pBCXO1_0063                                                                                                 | conserved_hypothetical_protein_protein                                 | <b>2.40</b>            |
| BCE_G9241_pBCXO1_0102                                                                                                 | conserved_hypothetical_protein_protein                                 | <b>2.09</b>            |
| BCE_G9241_pBCXO1_0103                                                                                                 | conserved_hypothetical_protein_protein                                 | <b>4.64</b>            |
| BCE_G9241_pBCXO1_0104                                                                                                 | conserved_hypothetical_protein_protein                                 | <b>3.39</b>            |
| BCE_G9241_pBCXO1_0105                                                                                                 | S-layer_homology_domain_protein                                        | <b>12.59</b>           |
| BCE_G9241_pBCXO1_0106                                                                                                 | PAP2_superfamily_domain_protein                                        | <b>9.54</b>            |
| BCE_G9241_pBCXO1_0108                                                                                                 | glycosyl_transferase_group_2_family_protein_domain_protein             | <b>172.58</b>          |
| BCE_G9241_pBCXO1_0109                                                                                                 | <i>galU</i> ; UTP-glucose-1-phosphate_uridylyltransferase              | <b>226.82</b>          |
| BCE_G9241_pBCXO1_0110                                                                                                 | UDP-glucose/GDP-mannose_dehydrogenase_family_NAD_binding_domain_family | <b>123.46</b>          |
| BCE_G9241_pBCXO1_0114                                                                                                 | IS861_transposase_OrfB                                                 | <b>2.78</b>            |
| BCE_G9241_pBCXO1_0115                                                                                                 | conserved_hypothetical_protein_protein                                 | <b>8.68</b>            |
| BCE_G9241_pBCXO1_0116                                                                                                 | conserved_hypothetical_protein_protein                                 | <b>25.80</b>           |
| BCE_G9241_pBCXO1_0117                                                                                                 | conserved_hypothetical_protein_protein                                 | <b>53.08</b>           |
| BCE_G9241_pBCXO1_0118                                                                                                 | conserved_hypothetical_protein_protein                                 | <b>40.10</b>           |
| BCE_G9241_pBCXO1_0119                                                                                                 | <i>cya</i> ; calmodulin-sensitive_adenylate_cyclase                    | <b>10.58</b>           |
| BCE_G9241_pBCXO1_0120                                                                                                 | <i>apt</i> ; adenine_phosphoribosyltransferase                         | <b>27.10</b>           |
| BCE_G9241_pBCXO1_0121                                                                                                 | <i>apt</i> ; adenine_phosphoribosyltransferase                         | <b>26.53</b>           |
| BCE_G9241_pBCXO1_0126                                                                                                 | conserved_hypothetical_protein_protein                                 | <b>5.61</b>            |
| BCE_G9241_pBCXO1_0128                                                                                                 | conserved_hypothetical_protein_protein                                 | <b>2.03</b>            |
